# Supplementary material for: Sequencing the extrachromosomal circular mobilome reveals retrotransposon activity in plants
Source: PLOS journal article supplement (doi:10.1371/journal.pgen.1006630), 2017-02-17
Supplement: S11 (10.1371/journal.pgen.1006630.s011) [file journal.pgen.1006630.s011]

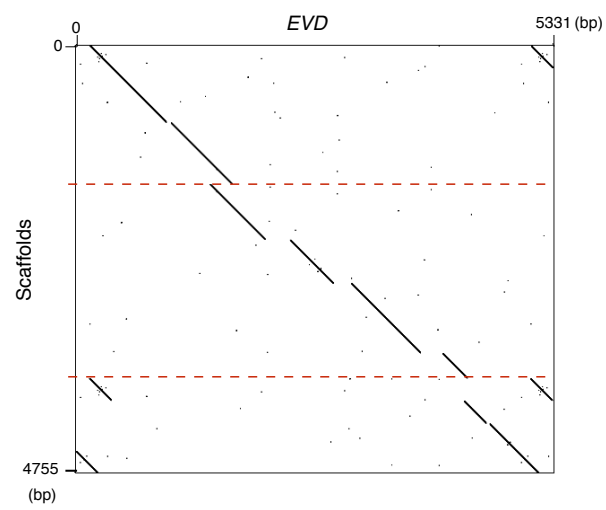

**Supplementary Figure 11**
