# Supplementary material for: Sequencing the extrachromosomal circular mobilome reveals retrotransposon activity in plants
Source: PLOS journal article supplement (doi:10.1371/journal.pgen.1006630), 2017-02-17
Supplement: S14 (10.1371/journal.pgen.1006630.s014) [file journal.pgen.1006630.s014]

**Supplementary Table 1.** Characteristics of the *A. thaliana* mobilome-seq libraries.

| Library<br>Analysis                                                          | WT (At_WT) |         | epi12 (At_e12) |         |
|------------------------------------------------------------------------------|------------|---------|----------------|---------|
|                                                                              | #1         | #2      | #1             | #2      |
| Library size (reads)                                                         | 74,086     | 170,910 | 415,282        | 587,918 |
| Reads mapping against organelles                                             | 18,288     | 39,808  | 161,924        | 151,128 |
| Reads mapping against genome                                                 | 31,373     | 69,160  | 132,390        | 208,653 |
| Mean coverage per 100bp (rpm)                                                | 2.301      | 2.606   | 1.897          | 2.372   |
| Total number of scaffolds ( <i>de novo</i> assembly)                         | 536        | 1548    | 863            | 2637    |
| Number of <i>de novo</i> assembled scaffolds significantly covered (p< 0.05) | 28         | 76      | 62             | 124     |
| Mean coverage for split reads (segemehl mapping) per 100bp (rpm)             | 0.250      | 0.285   | 0.121          | 0.209   |
